# Supplementary material for: Facile star-shaped tetraphenylethylene-based molecules with fused ring-terminated diarylamine as interfacial hole transporting materials for inverted perovskite solar cells
Source: Royal Society of Chemistry journal article supplement (doi:10.1039/d0qm00728e), 2020-11-18
Supplement: d0qm00728e1.pdf [file d0qm00728e1.pdf]

**Supporting information**

**Facile star shape tetraphenylethylene-based molecules with fused ring-terminated diarylamine as interfacial hole transporting materials for inverted perovskite solar cells**

**Yung-Chung Chen<sup>a,b\*</sup>, Ding-Zhi Lin<sup>a</sup>, Jhong-Ci Wang<sup>c</sup>, Jen-Shyang Ni<sup>a</sup>, Yang-Yen Yu<sup>c\*</sup> and Chih-Ping Chen<sup>c\*</sup>**

<sup>a</sup> Department of Chemical and Materials Engineering, National Kaohsiung University of Science and Technology, 415 Jiangong Rd., Sanmin District, Kaohsiung City 80778, Taiwan

<sup>b</sup> Photo-SMART (Photo-sensitive material advanced research and technology center), National Kaohsiung University of Science and Technology, 415, Jiangong Rd., Sanmin District, Kaohsiung City 80778, Taiwan

<sup>c</sup> Department of Materials Engineering, Ming Chi University of Technology, 84 Gunjuan Road, Taishan, New Taipei City, 24301, Taiwan

Corresponding authors: Yung-Chung Chen ([chenyc@nkust.edu.tw](mailto:chenyc@nkust.edu.tw)), Yang-Yen Yu ([yuyu@mail.mcut.edu.tw](mailto:yuyu@mail.mcut.edu.tw)), Chih-Ping Chen ([cpchen@mail.mcut.edu.tw](mailto:cpchen@mail.mcut.edu.tw))

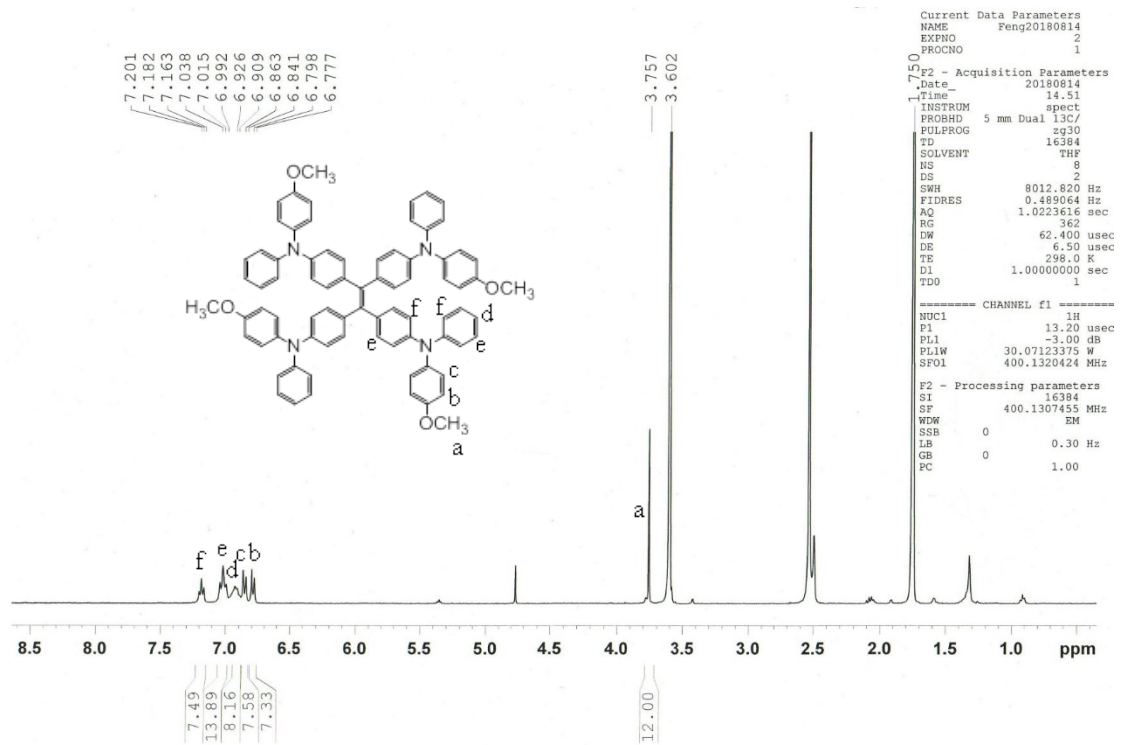

Fig. S1 <sup>1</sup>H NMR spectrum of the CL-1.

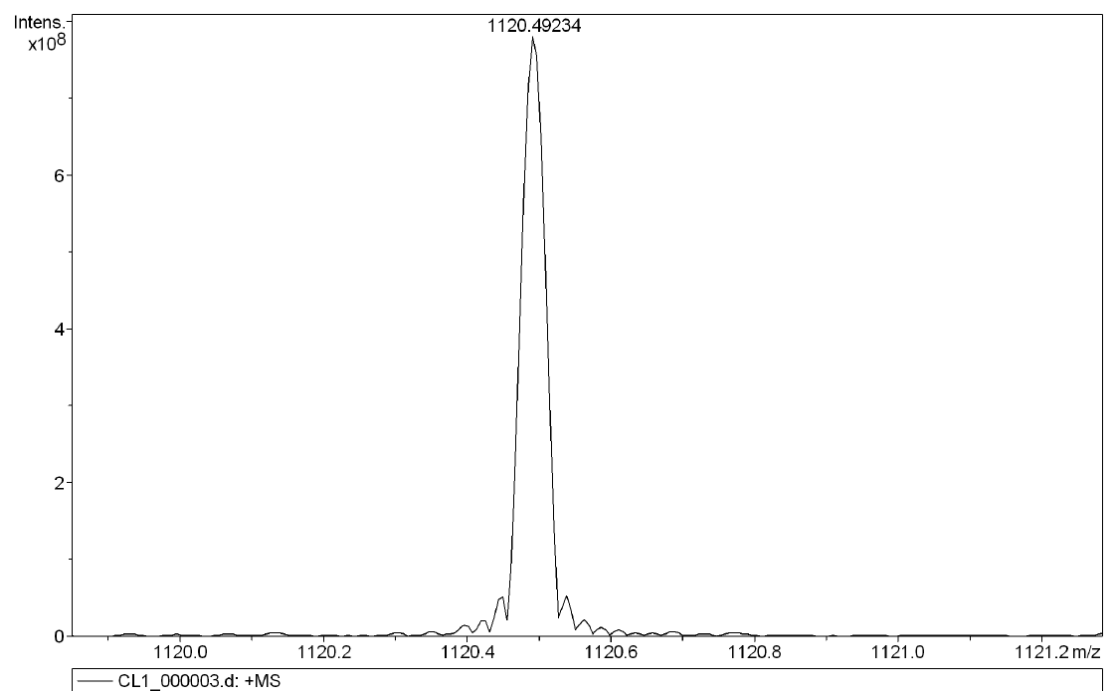

**Fig. S2** HRMS spectrum of the **CL-1**.

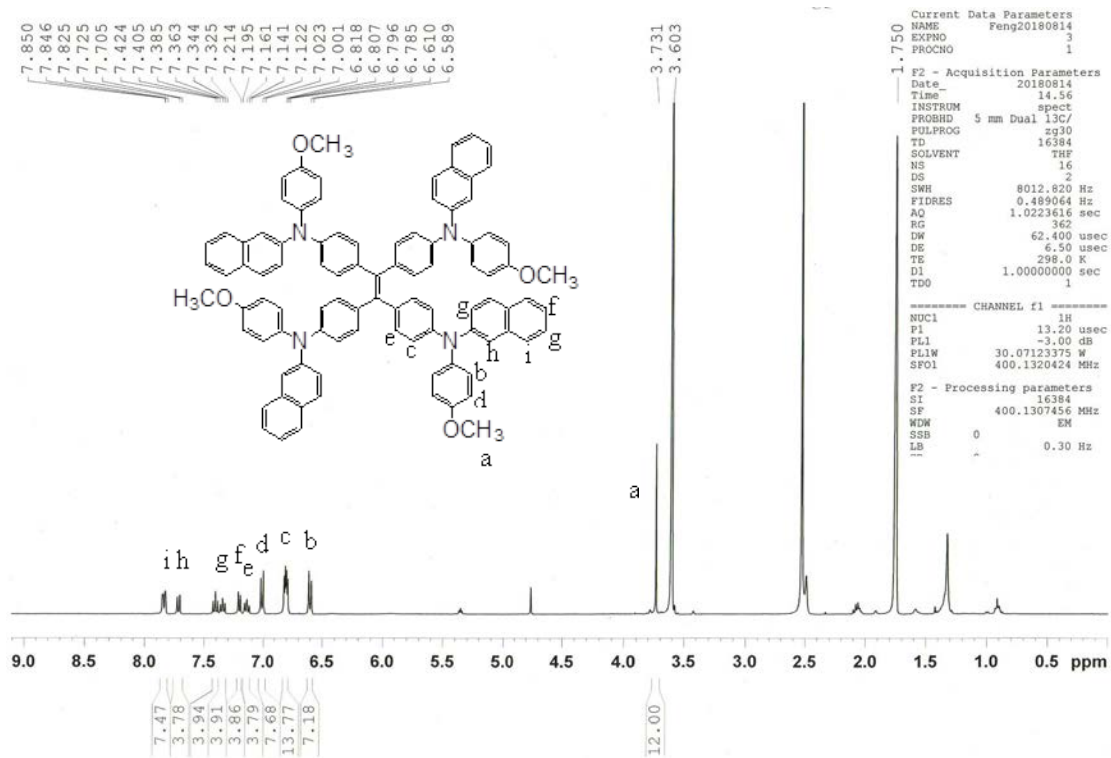

Fig. S3 <sup>1</sup>H NMR spectrum of the CL-2.

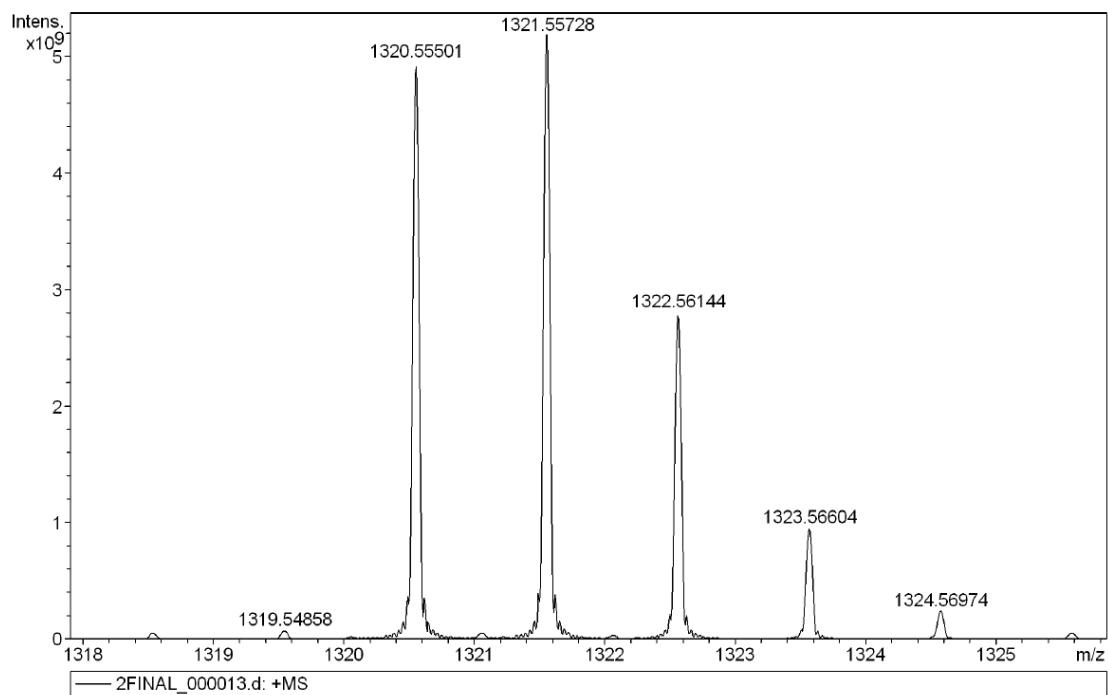

**Fig. S4** HRMS spectrum of the **CL-2**.

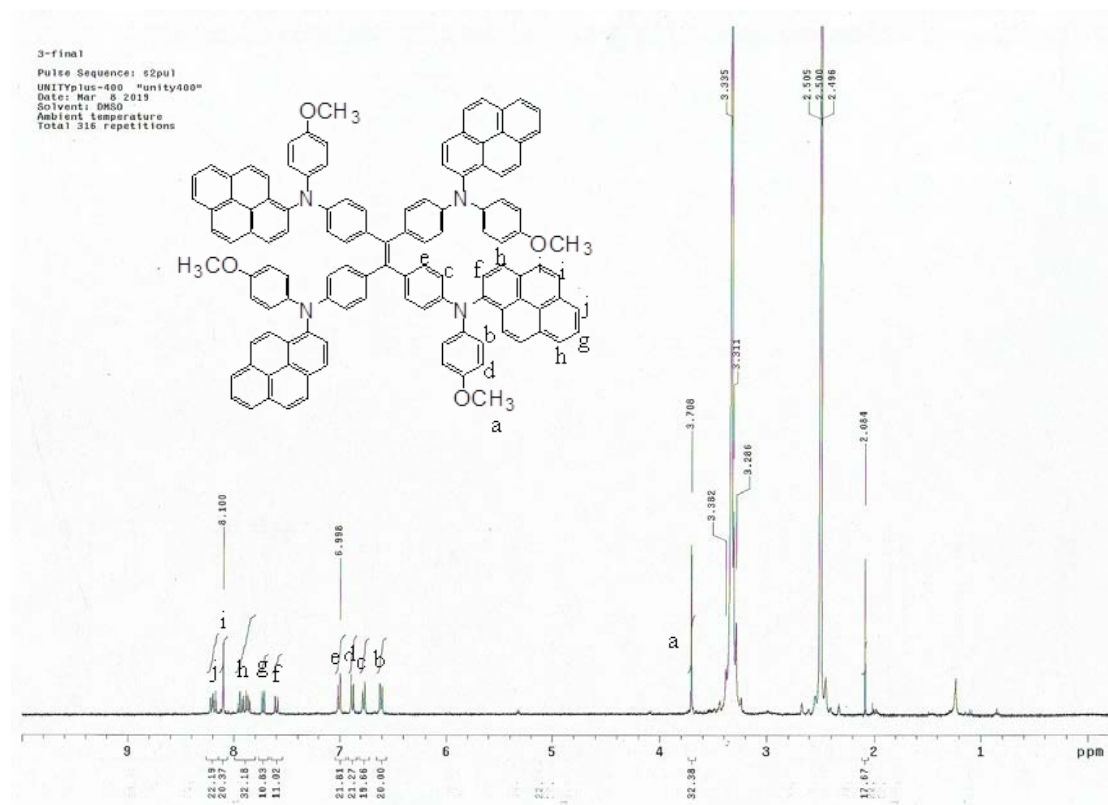

**Fig. S5**  $^1\text{H}$  NMR spectrum of the **CL-3**.

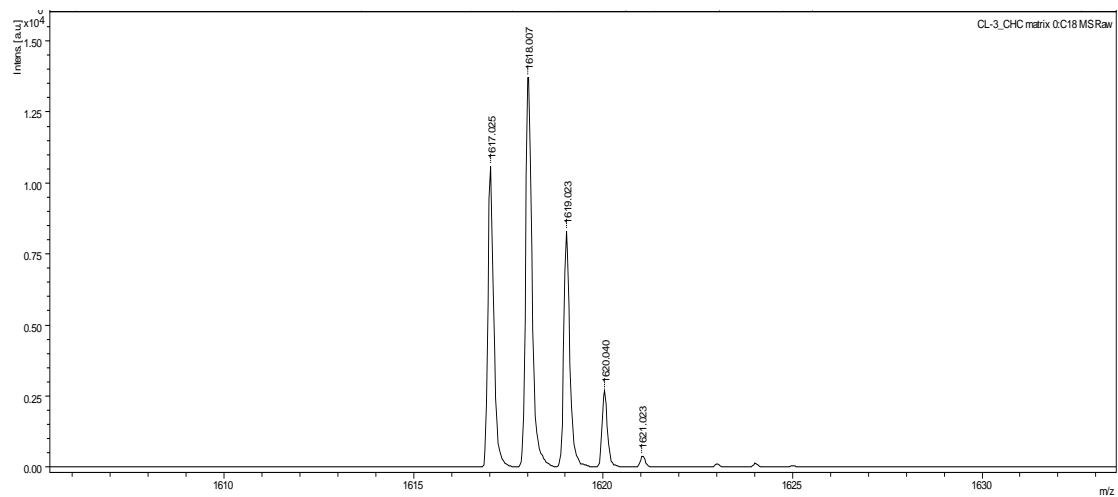

**Fig. S6** MALDI/TOF spectrum of the **CL-3**.

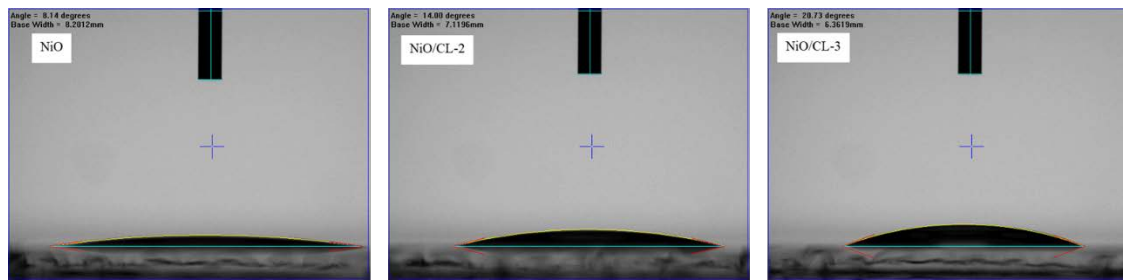

**Fig. S7** Water contact angle of various HTLs spin-coated onto the ITO glass.



**Table S1** Device performance based on ITO/HTMs/CH<sub>3</sub>NH<sub>3</sub>PbI<sub>3</sub>/PC<sub>61</sub>BM/BCP/Ag configuration

| HTM  | $J_{sc}$ (mA cm <sup>-2</sup> ) | $V_{oc}$ (V) | FF (%)     | $\eta_{avg}$ (%) | $\eta_{max}$ (%) |
|------|---------------------------------|--------------|------------|------------------|------------------|
| CL-2 | 18.91±1.29                      | 0.99±0.37    | 70.30±2.29 | 13.09±0.52       | 14.01            |
| CL-3 | 17.93±0.69                      | 0.99±0.05    | 66.98±2.44 | 11.84±0.49       | 12.46            |

<sup>a</sup> Calculated from 10 devices.

**Table S2** Lifetimes of perovskite thin films of MAPbI<sub>3</sub>-based perovskite devices

| Sample        | $\tau_1$ (ns) | A <sub>1</sub> | $\tau_2$ (ns) | A <sub>2</sub> | $\tau_{Average}$ (ns) |
|---------------|---------------|----------------|---------------|----------------|-----------------------|
| NiOx/PVSK     | 7.4           | 32%            | 53.3          | 68%            | 38.7                  |
| NiOx/CL-2PVSK | 8.1           | 34%            | 49.9          | 66%            | 35.6                  |
| NiOx/CL-3PVSK | 6.8           | 35%            | 48.7          | 65%            | 34.1                  |

The lifetime was obtained by fitting the PL data measured from the perovskite films with a

biexponential decay function of the form:  $\tau_{Average} = A_1 e^{-t/\tau_1} + A_2 e^{-t/\tau_2}$

**Table S3** FWHM and crystallite size results of the perovskite films with different HTL layers

| HTL       | FWHM    | Crystallite size <sup>a</sup> (nm) |
|-----------|---------|------------------------------------|
| NiOx      | 0.37239 | 21.74                              |
| NiOx/CL-2 | 0.37199 | 21.77                              |
| NiOx/CL-3 | 0.36944 | 21.92                              |

<sup>a</sup> The crystallite size is determined by the peak of (110) at  $2\theta$  of around 14.1° and calculated from the Debye–Scherrer equation  $\tau = k\lambda/BCos\theta$  ( $\tau$  = crystallite size).

**Table S4** EIS results of the perovskite devices based on various HTLs<sup>a</sup>

| Sample    | R <sub>s</sub> | R <sub>p</sub> | CPE-T   | CPE-P |
|-----------|----------------|----------------|---------|-------|
| NiOx      | 16             | 467            | 7.94E-9 | 0.98  |
| NiOx/CL-3 | 12             | 265            | 5.44E-9 | 1.03  |

<sup>a</sup> Equivalent circuit model:

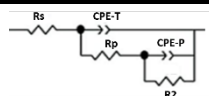

**Table S5** Contact angles and surface energies of various HTLs

| HTL               | $\theta_{\text{Water}} [^\circ]$ | $\theta_{\text{DM}} [^\circ]$ | $\gamma_{\text{polar}} [\text{mN m}^{-1}]$ | $\gamma_{\text{dispersive}} [\text{mN m}^{-1}]$ | $\gamma_{\text{total}} [\text{mN m}^{-1}]$ |
|-------------------|----------------------------------|-------------------------------|--------------------------------------------|-------------------------------------------------|--------------------------------------------|
| <b>CL-2</b>       | 73.58                            | 15.36                         | 9.85                                       | 49.98                                           | 58.87                                      |
| <b>CL-3</b>       | 72.90                            | 14.24                         | 10.11                                      | 49.02                                           | 59.37                                      |
| NiOx              | 11.45                            | 10.36                         | 35.29                                      | 49.98                                           | 85.27                                      |
| NiOx/ <b>CL-2</b> | 13.37                            | 21.31                         | 35.62                                      | 47.44                                           | 83.06                                      |
| NiOx/ <b>CL-3</b> | 20.51                            | 22.546                        | 33.86                                      | 47.06                                           | 80.92                                      |
